# Supplementary material for: Dendritic Cell/Cytokine-Induced Killer Cell Immunotherapy Combined with S-1 in Patients with Advanced Pancreatic Cancer: A Prospective Study
Source: Oxford University Press journal article supplement (doi:10.1158/1078-0432.ccr-17-0492), 2017-06-13
Supplement: 10780432ccr170492-sup-179278_2_supp_4074308_xqvfkp.docx [file 10780432ccr170492-sup-179278_2_supp_4074308_xqvfkp.docx]

**Supplementary figure 1: A-D:** comparison of frequency of cfDNA molecules carrying mutations in 4 patients before and after treatment with DC-CIK cell therapy.
